# Supplementary material
Source: PubMed Central journal article supplement (PMC5489333)
Supplement: NIHMS6433-supplement-supplement_1.pdf [file NIHMS6433-supplement-supplement_1.pdf]

**Supplementary table 1 – Sperm parameters of the donors participating in this study.**

| <b>Parameter</b>                                                | <b>Mean <math>\pm</math> ESM</b> | <b>Median (range)</b> |
|-----------------------------------------------------------------|----------------------------------|-----------------------|
| Volume (ml)                                                     | 2.9 $\pm$ 0.4                    | 2.5 (0.8-8)           |
| Sperm concentration ( $10^6$ cells/ml)                          | 232.7 $\pm$ 47.6                 | 193.5 (15.6-829.8)    |
| Total sperm count                                               | 609.6 $\pm$ 114.2                | 514.4 (93.9-2074.5)   |
| Progressive motility                                            | 67 $\pm$ 3                       | 65 (41-91)            |
| Total motility                                                  | 79 $\pm$ 3                       | 77 (54-96)            |
| Distance curved line (DCL; $\mu\text{m}$ )                      | 31.6 $\pm$ 0.9                   | 31.8 (22.1-38.5)      |
| Distance average path (DAP; $\mu\text{m}$ )                     | 21.8 $\pm$ 0.5                   | 21.5 (16.6-28.5)      |
| Distance straight line (DSL; $\mu\text{m}$ )                    | 17.2 $\pm$ 0.6                   | 17.0 (12.2-25)        |
| Curvilinear velocity (VCL; $\mu\text{m}/\text{sec}$ )           | 71.2 $\pm$ 2.2                   | 72.0 (51.1-88.2)      |
| Average path velocity (VAP; $\mu\text{m}/\text{sec}$ )          | 50.5 $\pm$ 1.7                   | 49.2 (38.4-74.7)      |
| Straight-line velocity (VSL; $\mu\text{m}/\text{sec}$ )         | 38.9 $\pm$ 1.3                   | 38.5 (29.6-55.7)      |
| Linearity (LIN; VSL/VCL)                                        | 0.5 $\pm$ 0                      | 0.5 (0.4-0.7)         |
| Straightness (STR; VSL/VAP)                                     | 0.8 $\pm$ 0                      | 0.8 (0.6-0.9)         |
| Wobble (WOB; VAP/VCL)                                           | 0.7 $\pm$ 0                      | 0.7 (0.6-0.8)         |
| Beat cross frequency BCF (hertz)                                | 26.7 $\pm$ 0.5                   | 26.4 (24.1-32.1)      |
| Amplitude of lateral head displacement<br>ALH ( $\mu\text{m}$ ) | 2.1 $\pm$ 0.1                    | 2.0 (1.5-2.7)         |
| Average orientation change of the head<br>(AOC; $^\circ$ )      | 22.9 $\pm$ 0.9                   | 22.5 (15.5-31.9)      |

N=21

**Supplementary table 2 – Protein candidates susceptible of redox-dependent modifications**

| <b>Protein</b>                        | <b>Tyrosine nitration</b> | <b>S-Glutahionylation</b> | <b>Reference</b>                                                                                               |
|---------------------------------------|---------------------------|---------------------------|----------------------------------------------------------------------------------------------------------------|
| <i>Glycolitic enzymes</i>             |                           |                           |                                                                                                                |
| glyceraldehyde 3-P dehydrogenase      | ✓                         | ✓                         | (Gokulrangan <i>et al.</i> 2007; Lind <i>et al.</i> 2002; Fratelli <i>et al.</i> 2004)                         |
| enolase                               | ✓                         |                           | (Gokulrangan <i>et al.</i> 2007; Lind <i>et al.</i> 2002)                                                      |
| fructose 1,6 bi phosphate aldolase    |                           | ✓                         | (Fratelli <i>et al.</i> 2004)                                                                                  |
| <i>Krebs cycle enzymes</i>            |                           |                           |                                                                                                                |
| aconitase                             | ✓                         |                           | (Gokulrangan <i>et al.</i> 2007; Lind <i>et al.</i> 2002)                                                      |
| $\alpha$ -ketoglutarate dehydrogenase | ✓                         | ✓                         | (Shi <i>et al.</i> 2011; Gokulrangan <i>et al.</i> 2007; Lind <i>et al.</i> 2002; Fratelli <i>et al.</i> 2004) |
| malate dehydrogenase                  | ✓                         | ✓                         | (Gokulrangan <i>et al.</i> 2007; Lind <i>et al.</i> 2002; Fratelli <i>et al.</i> 2004)                         |
| dihydro lipoamide dehydrogenase       | ✓                         |                           | (Shi <i>et al.</i> 2011; Gokulrangan <i>et al.</i> 2007; Lind <i>et al.</i> 2002)                              |
| <i>Structural proteins</i>            |                           |                           |                                                                                                                |
| actin                                 |                           | ✓                         | (Dalle-Donne <i>et al.</i> 2003; Pastore <i>et al.</i> 2003; Fratelli <i>et al.</i> 2004)                      |
| tubulin                               | ✓                         | ✓                         | (Landino <i>et al.</i> 2004)                                                                                   |
| <i>Antioxidant enzymes</i>            |                           |                           |                                                                                                                |
| PRDX1                                 |                           | ✓                         | (Lind <i>et al.</i> 2002)                                                                                      |
| PRDX6                                 |                           | ✓                         | (Noguera-Mazon <i>et al.</i> 2006)                                                                             |
| <i>Other enzymes</i>                  |                           |                           |                                                                                                                |
| Metalloproteinase-9                   | ✓                         |                           | (Wang <i>et al.</i> 2011)                                                                                      |
